# Supplementary material
Source: PubMed Central journal article supplement (PMC6331247)
Supplement: NIHMS1510343-supplement-1.pdf [file NIHMS1510343-supplement-1.pdf]

## Supplementary Method

The combined ADGC imputed datasets (data freeze in September 2014) were created as following steps outlined below.

1. Convert Oxford GEN/SAMPLE format from 32 studies with each study divided by autosomal chromosome (i.e., 704 GEN files) to PLINK format
  - a. Filter SNPs with low info (info < 0.5)
  - b. Treat calls with uncertainty greater than 0.1 as missing
  - c. Remove duplicate SNPs
2. Merge datasets into one PLINK format dataset
  - a. Flip SNPs with strand error
  - b. Filter MAF < 0.01
3. Address known and cryptic relatedness
  - a. Remove related individuals identified using a kinship coefficient cut-off of 0.0442 (i.e., 3rd degree relatives) in KING-Robust

Supplementary Table 1. Single nucleotide polymorphisms for Alzheimer's Disease identified in the previous studies

| Gene                 | CHR | SNP               | Position    | Annotation                 | 1000 Genomes |                |      | References |
|----------------------|-----|-------------------|-------------|----------------------------|--------------|----------------|------|------------|
|                      |     |                   |             |                            | MAF          | r <sup>2</sup> | D'   |            |
| <i>CRI</i>           | 1   | <b>rs6656401</b>  | 207,692,049 | Intron                     | 0.17         |                |      | [1, 2]     |
|                      |     | rs3818361         | 207,784,968 | Intron                     | 0.18         | 0.83           | 0.94 | [3, 4]     |
|                      |     | rs6701713         | 207,786,289 | Intron                     | 0.18         | 0.83           | 0.94 | [3, 5, 6]  |
|                      |     | rs1408077         | 207,804,141 | Intron                     | 0.18         | 0.83           | 0.93 | [3, 7]     |
| <i>BINI</i>          | 2   | <b>rs6733839</b>  | 127,892,810 | Regulatory region variant  | 0.38         |                |      | [1]        |
|                      |     | rs744373          | 12,789,4615 | Intergenic variant         | 0.27         | 0.49           | 0.90 | [3, 4, 8]  |
|                      |     | rs7561528         | 127,889,637 | Intergenic variant         | 0.31         | 0.35           | 0.69 | [3, 5, 7]  |
| <i>INPP5D</i>        | 2   | <b>rs35349669</b> | 234,068,476 | Intron                     | 0.46         |                |      | [1]        |
| <i>MEF2C</i>         | 5   | <b>rs190982</b>   | 88,223,420  | Intron                     | 0.37         |                |      | [1]        |
| <i>HLA-DRB5-DBR1</i> | 6   | <b>rs9271192</b>  | 32,578,530  | Intergenic variant         | 0.26         |                |      | [1]        |
| <i>CD2AP</i>         | 6   | <b>rs10948363</b> | 47,487,762  | Intron                     | 0.25         |                |      | [1]        |
|                      |     | rs9296559         | 47,452,270  | Intron                     | 0.25         | 1              | 1    | [4]        |
|                      |     | rs9349407         | 47,453,378  | Intron                     | 0.25         | 1              | 1    | [4-6]      |
| <i>NME8</i>          | 7   | <b>rs2718058</b>  | 37,841,534  | Intron                     | 0.37         |                |      | [1]        |
| <i>ZCWPW1</i>        | 7   | <b>rs1476679</b>  | 100,004,446 | Intron                     | 0.30         |                |      | [1]        |
| <i>EPHA1</i>         | 7   | <b>rs11771145</b> | 143,110,762 | Intron                     | 0.36         |                |      | [1]        |
|                      |     | rs11767557        | 143,109,139 | Intron                     | 0.22         | 0.25           | 0.71 | [4, 5]     |
| <i>PTK2B</i>         | 8   | <b>rs28834970</b> | 27,195,121  | Intron                     | 0.34         |                |      | [1]        |
| <i>CLU</i>           | 8   | <b>rs9331896</b>  | 27,467,686  | Intron                     | 0.40         |                |      | [1]        |
|                      |     | rs11136000        | 27,464,519  | Intron                     | 0.39         | 0.91           | 0.97 | [2, 3]     |
|                      |     | rs9331888         | 27,468,862  | 5 prime UTR                | 0.30         | 0.28           | 1    | [2, 9]     |
|                      |     | rs2279590         | 27,456,253  | Non coding transcript exon | 0.41         | 0.83           | 0.93 | [2]        |

|                     |    |                               |             |                                    |       |       |      |         |
|---------------------|----|-------------------------------|-------------|------------------------------------|-------|-------|------|---------|
|                     |    | rs7982                        | 27,462,481  | Missense                           | 0.39  | 0.90  | 0.97 |         |
|                     |    | rs7012010                     | 27,448,729  | Downstream gene variant            | 0.28  | 0.18  | 0.83 |         |
|                     |    | rs1532278                     | 27,466,315  | Non coding transcript exon variant | 0.39  | 0.91  | 0.97 | [5]     |
| <i>CELF1</i>        | 11 | <b>rs10838725</b>             | 47,557,871  | Intron                             | 0.28  |       |      | [1]     |
|                     |    | rs1057233                     | 47,376,448  | 3 prime UTR variant                | 0.32  | 0.17  | 0.97 | [10]    |
| <i>MS4A</i>         | 11 | <b>rs983392</b>               | 59,923,508  | Downstream intergenic              | 0.41  |       |      | [1]     |
|                     |    | rs670139                      | 59,971,795  | Intron                             | 0.40  | 0.44  | 0.97 | [4, 5]  |
|                     |    | rs4938933                     | 60,034,429  | Intergenic                         | 0.40  | 0.70  | 0.85 | [5]     |
|                     |    | rs610932                      | 59,939,307  | 3 prime UTR variant                | 0.44  | 0.72  | 0.89 | [3, 4]  |
|                     |    | rs662196                      | 59,942,757  | Intron                             | 0.44  | 0.69  | 0.88 | [3]     |
|                     |    | rs583791                      | 59,947,252  | Missense                           | 0.48  | 0.68  | 0.87 | [3]     |
| <i>PICALM</i>       | 11 | <b>rs10792832</b>             | 85,867,875  | Downstream intergenic              | 0.37  |       |      | [1]     |
|                     |    | rs3851179                     | 85,868,640  | Downstream gene variant            | 0.37  | 0.99  | 0.99 | [3, 11] |
|                     |    | rs541458                      | 85,788,351  | Intergenic                         | 0.32  | 0.64  | 0.90 | [2]     |
|                     |    | rs561655                      | 85,800,279  | Upstream gene variant              | 0.35  | 0.77  | 0.92 | [5]     |
| <i>SORL1</i>        | 11 | <b>rs11218343</b>             | 121,435,587 | Intron                             | 0.043 |       |      | [1]     |
| <i>FERMT2</i>       | 14 | <b>rs17125944</b>             | 53,400,629  | Intron                             | 0.081 |       |      | [1]     |
| <i>SLC24A4-RIN3</i> | 14 | <b>rs10498633</b>             | 92,926,952  | Intron                             | 0.22  |       |      | [1]     |
| <i>DSG2</i>         | 18 | <b>rs8093731</b> <sup>a</sup> | 29,088,958  | Intron                             | 0.012 |       |      | [1]     |
| <i>ABCA7</i>        | 19 | <b>rs4147929</b>              | 1,063,443   | Intron                             | 0.19  |       |      | [1]     |
|                     |    | rs3764650                     | 1,046,520   | Intron                             | 0.11  | 0.77  | 0.92 | [4, 6]  |
|                     |    | rs72973581                    | 1,043,103   | Missense                           | 0.053 | 0.012 | 1    | [12]    |

|              |    |                               |            |                       |       |      |   |           |
|--------------|----|-------------------------------|------------|-----------------------|-------|------|---|-----------|
| <i>CD33</i>  | 19 | <b>rs3865444</b> <sup>a</sup> | 51,727,962 | Upstream gene variant | 0.31  |      |   | [1, 4, 5] |
|              |    | rs3826656                     | 51,726,613 | Upstream gene variant | 0.22  | 0.13 | 1 |           |
|              |    | rs12459419                    | 51,728,477 | Missense              | 0.31  | 1    | 1 |           |
| <i>CASS4</i> | 20 | <b>rs7274581</b>              | 55,018,260 | Intron                | 0.080 |      |   | [1]       |

<sup>a</sup> The SNPs were reported not to reach statistical significance on meta-analysis [1].

Bold SNP ID represents the SNP identified the International Genomics of Alzheimer's Project reported by Lambert et al [1].

Key: CHR, chromosome; SNP, single nucleotide polymorphism; 1000 Genomes, 1000 Genomes Project Phase 3 in individuals of European ancestry; MAF, minor allele frequency

Supplementary Table 2. ADGC and CHARGE studies in ADSP WES data and ADGC imputed data

| Consortium | Study    | WES data | Imputed data |
|------------|----------|----------|--------------|
| ADGC       |          |          |              |
|            | ACT      | X        | X            |
|            | ADC      | X        | X            |
|            | ADNI     |          | X            |
|            | BIOCARD  |          | X            |
|            | CHAP     | X        | X            |
|            | EAS      |          | X            |
|            | EFIGA    | X        |              |
|            | GDF      | X        |              |
|            | GSK      |          | X            |
|            | MAP      | X        | X            |
|            | MAYO     | X        | X            |
|            | MAYO PD  | X        | X            |
|            | MIA      | X        |              |
|            | MIRAGE   | X        | X            |
|            | NBB      |          | X            |
|            | NCRAD    | X        |              |
|            | NIA-LOAD | X        | X            |
|            | OHSU     |          | X            |
|            | RAS      | X        |              |
|            | ROS      | X        | X            |
|            | TAR      |          | X            |
|            | TARCC    | X        |              |
|            | TGEN     |          | X            |
|            | TOR      | X        |              |
|            | UKS      |          | X            |
|            | UMVUMSSM |          | X            |
|            | UPITT    |          | X            |
|            | VAN      | X        | X            |
|            | WASHU    |          | X            |
|            | WHICAP   | X        | X            |
| CHARGE     |          |          |              |
|            | ARIC     | X        |              |
|            | ASPS     | X        |              |
|            | CHS      | X        |              |
|            | ERF      | X        |              |
|            | FHS      | X        |              |
|            | RS       | X        |              |

Supplementary Table 3. Subject (age at death  $\geq 65$  years) information of each expression datasets of entorhinal cortex (EC), frontal cortex (FCTX), hippocampus (HIPP), and temporal cortex (TCTX)

| Brain region | Study    | # of AD cases | # of AD controls | # of male | # of female | Mean age $\pm$ SD |
|--------------|----------|---------------|------------------|-----------|-------------|-------------------|
| EC           | GSE48350 | 15            | 17               | 16        | 16          | 83.9 $\pm$ 8.3    |
|              | GSE5281  | 10            | 12               | 9         | 13          | 83.5 $\pm$ 7.4    |
|              | Total    | 25            | 29               | 25        | 29          |                   |
| FCTX         | GSE48350 | 21            | 25               | 19        | 27          | 84.1 $\pm$ 8.8    |
|              | GSE5281  | 23            | 10               | 14        | 19          | 79.7 $\pm$ 7.9    |
|              | GSE66333 | 8             | 0                | 5         | 3           | 83.1 $\pm$ 7.0    |
|              | GSE53890 | 0             | 21               | 11        | 10          | 88.0 $\pm$ 11.2   |
|              | Total    | 52            | 56               | 49        | 59          |                   |
| HIPP         | GSE48350 | 18            | 24               | 22        | 20          | 83.4 $\pm$ 8.3    |
|              | GSE5281  | 10            | 12               | 7         | 15          | 79.5 $\pm$ 7.3    |
|              | GSE28146 | 22            | 8                | 12        | 18          | 86.3 $\pm$ 7.7    |
|              | Total    | 50            | 44               | 41        | 53          |                   |
| TCTX         | GSE5281  | 16            | 11               | 10        | 17          | 80.1 $\pm$ 7.3    |
|              | GSE29652 | 18            | 0                | 5         | 13          | 84.7 $\pm$ 9.9    |
|              | Total    | 34            | 11               | 15        | 30          |                   |

Key: SD, standard deviation; EC, entorhinal cortex; FCTX, frontal cortex; HIPP, hippocampus; TCTX, temporal cortex

Supplementary Table 4. The numbers of probes in each platform

| Chromosome | ADNI   | NABEC<br>GPL6947 | UKBEC<br>GPL5175 |
|------------|--------|------------------|------------------|
| 1          | 4,339  | 3,244            | 2,606            |
| 2          | 2,792  | 2,025            | 1,809            |
| 3          | 2,381  | 1,654            | 1,495            |
| 4          | 1,731  | 1,212            | 1,000            |
| 5          | 1,991  | 1,457            | 1,125            |
| 6          | 2,224  | 1,575            | 1,383            |
| 7          | 1,934  | 1,449            | 1,363            |
| 8          | 1,429  | 1,120            | 923              |
| 9          | 1,654  | 1,292            | 1,077            |
| 10         | 1,693  | 1,261            | 1,035            |
| 11         | 2,559  | 1,871            | 1,590            |
| 12         | 2,283  | 1,566            | 1,353            |
| 13         | 774    | 567              | 484              |
| 14         | 1,339  | 939              | 840              |
| 15         | 1,286  | 1,066            | 872              |
| 16         | 1,639  | 1,309            | 1,124            |
| 17         | 2,405  | 1,776            | 1,541            |
| 18         | 629    | 461              | 450              |
| 19         | 2,390  | 1,908            | 1,476            |
| 20         | 1,108  | 871              | 728              |
| 21         | 517    | 454              | 332              |
| 22         | 923    | 799              | 603              |
| Total      | 40,020 | 29,879           | 25,479           |

ADNI platform = Affymetrix Human Genome U219 Array platform; GPL6947 = Illumina HumanHT-12 V3.0 expression beadchip; GPL5175 = Affymetrix Human Exon 1.0 ST Array [transcript (gene) version]

Key: ADNI, Alzheimer's Disease Neuroimaging Initiative; NABEC, North American Brain Expression Consortium; UKBEC, United Kingdom Brain Expression Consortium

Supplementary Table 5. Characteristics of the individual in ADGC and ADSP

| Variable                          | Overall<br>n (%) | AD cases<br>n (%) | AD controls<br>n (%) |
|-----------------------------------|------------------|-------------------|----------------------|
| ADGC (n = 15,330)                 |                  | 7,364 (48.0)      | 7,966 (52.0)         |
| Sex                               |                  |                   |                      |
| Male                              | 6,107 (39.8)     | 2,880 (52.8)      | 3,227 (47.2)         |
| Female                            | 9,223 (60.2)     | 4,484 (51.4)      | 4,739 (48.6)         |
| Age at the last visit or at death |                  |                   |                      |
| 65-69                             | 2,023 (13.2)     | 687 (34.0)        | 1,336 (66.0)         |
| 70-74                             | 3,300 (21.5)     | 1,275 (38.6)      | 2,025 (61.4)         |
| 75-79                             | 4,091 (26.7)     | 1,712 (41.8)      | 2,379 (58.2)         |
| 80-84                             | 2,932 (19.1)     | 1,689 (57.6)      | 1,243 (52.4)         |
| 84-90                             | 1,826 (11.9)     | 1,205 (66.0)      | 621 (34.0)           |
| 90+                               | 1,158 (7.6)      | 796 (68.7)        | 362 (31.3)           |
| <i>APOE</i>                       |                  |                   |                      |
| -/-                               | 7,805 (54.2)     | 2,372 (30.4)      | 5,433 (69.6)         |
| -/ $\epsilon$ 4                   | 5,212 (36.2)     | 3,451 (66.2)      | 1,761 (33.8)         |
| $\epsilon$ 4/ $\epsilon$ 4        | 1,389 (9.6)      | 1,238 (89.1)      | 151 (10.9)           |
| ADSP (n = 10,407)                 |                  | 5,350 (51.4)      | 5,057 (48.6)         |
| Sex                               |                  |                   |                      |
| Male                              | 4,366 (42.0)     | 2,308 (52.9)      | 2,058 (47.1)         |
| Female                            | 6,041 (58.0)     | 3,042 (50.4)      | 2,999 (49.6)         |
| Age at the last visit or at death |                  |                   |                      |
| 65-69                             | 568 (5.5)        | 535 (94.2)        | 33 (5.8)             |
| 70-74                             | 1,123 (10.8)     | 1,058 (94.2)      | 65 (5.8)             |
| 75-79                             | 1,348 (13.0)     | 1,147 (85.1)      | 201 (14.9)           |
| 80-84                             | 2,634 (25.3)     | 1,088 (41.3)      | 1,546 (58.7)         |
| 84-90                             | 3,120 (30.0)     | 892 (28.6)        | 2,228 (71.4)         |
| 90+                               | 1,614 (15.5)     | 630 (39.0)        | 984 (61.0)           |
| <i>APOE</i>                       |                  |                   |                      |
| -/-                               | 7,431 (71.4)     | 3,128 (42.1)      | 4,303 (57.9)         |
| -/ $\epsilon$ 4                   | 2,886 (27.7)     | 2,148 (74.4)      | 738 (25.6)           |
| $\epsilon$ 4/ $\epsilon$ 4        | 90 (0.9)         | 74 (82.2)         | 16 (17.8)            |

Key: ADSP, Alzheimer's Disease Sequencing Project; ADGC, Alzheimer's Disease Genetic Consortium; *APOE*, apolipoprotein E



Supplementary Table 6. IGAP SNPs and its proxies

| IGAP SNP                                 | Closest Gene    | Exonic SNP |             |                      |                     | 1000 Genomes EUR |       |                |      |
|------------------------------------------|-----------------|------------|-------------|----------------------|---------------------|------------------|-------|----------------|------|
|                                          |                 | SNP ID     | Position    | Variant <sup>a</sup> | Major/minor alleles | Gene             | MAF   | r <sup>2</sup> | D'   |
| Strong LD (r <sup>2</sup> ≥ 0.8)         |                 |            |             |                      |                     |                  |       |                |      |
| rs6656401                                | <i>CR1</i>      | rs4844600  | 207,679,307 | E60E                 | G/A                 | <i>CR1</i>       | 0.19  | 0.88           | 0.99 |
|                                          |                 | rs2296160  | 207,795,320 | A2419T               | G/A                 | <i>CR1</i>       | 0.18  | 0.84           | 0.93 |
| rs9271192                                | <i>HLA-DRB5</i> | rs9270303  | 32,557,483  | A13T                 | C/T                 | <i>HLA-DRB1</i>  | 0.25  | 0.92           | 0.99 |
| rs1476679                                | <i>ZCWPW1</i>   | rs2405442  | 99,971,313  | L12L                 | C/T                 | <i>PILRA</i>     | 0.32  | 0.85           | 0.97 |
|                                          |                 | rs1859788  | 99,971,834  | G78R                 | G/A                 | <i>PILRA</i>     | 0.32  | 0.85           | 0.97 |
| rs9331896                                | <i>CLU</i>      | rs7982     | 27,462,481  | H263H                | G/A                 | <i>CLU</i>       | 0.39  | 0.90           | 0.97 |
| rs10838725                               | <i>CELF1</i>    | rs2293576  | 47,434,986  | A191A                | G/A                 | <i>SLC39A13</i>  | 0.31  | 0.84           | 0.99 |
| rs983392                                 | <i>MS4A6A</i>   | rs12453    | 59,945,745  | L137L                | T/C                 | <i>MS4A6A</i>    | 0.40  | 0.80           | 0.91 |
| rs4147929                                | <i>ABCA7</i>    | rs3752246  | 1,056,492   | A1527G               | C/G                 | <i>ABCA7</i>     | 0.19  | 0.97           | 1    |
| rs3865444                                | <i>CD33</i>     | rs12459419 | 51,728,477  | A14V                 | C/T                 | <i>CD33</i>      | 0.31  | 1              | 1    |
| Moderate LD (0.4 ≤ r <sup>2</sup> < 0.8) |                 |            |             |                      |                     |                  |       |                |      |
| rs9271192                                | <i>HLA-DRB5</i> | rs2308759  | 32,549,596  | V130V                | C/T                 | <i>HLA-DRB1</i>  | 0.14  | 0.45           | 1    |
|                                          |                 | rs1049092  | 32,629,802  | D201D                | G/A                 | <i>HLA-DQB1</i>  | 0.40  | 0.51           | 0.97 |
|                                          |                 | rs1049086  | 32,629,904  | D167D                | G/A                 | <i>HLA-DQB1</i>  | 0.40  | 0.50           | 0.97 |
| rs2718058                                | <i>NME8</i>     | rs2722372  | 37,890,267  | R43K                 | G/A                 | <i>NME8</i>      | 0.25  | 0.49           | 0.93 |
|                                          |                 | rs2598044  | 37,890,316  | D59D                 | C/T                 | <i>NME8</i>      | 0.25  | 0.49           | 0.93 |
| rs1476679                                | <i>ZCWPW1</i>   | rs909152   | 100,175,473 | G337G                | C/T                 | <i>LRCH4</i>     | 0.31  | 0.53           | 0.75 |
| rs10838725                               | <i>CELF1</i>    | rs12286721 | 47,701,528  | I671M                | A/C                 | <i>AGBL2</i>     | 0.28  | 0.48           | 0.97 |
| rs983392                                 | <i>MS4A6A</i>   | rs7232     | 59,940,599  | T213S                | T/A                 | <i>MS4A6A</i>    | 0.36  | 0.68           | 0.92 |
| rs8093731                                | <i>DSG2</i>     | rs16961975 | 29,046,606  | V509M                | G/A                 | <i>DSG3</i>      | 0.012 | 0.51           | 0.75 |
|                                          |                 | rs61730311 | 29,049,138  | R575W                | C/T                 | <i>DSG3</i>      | 0.010 | 0.67           | 0.90 |
| rs4147929                                | <i>ABCA7</i>    | rs4147930  | 1,064,193   | L1995L               | A/G                 | <i>ABCA7</i>     | 0.28  | 0.56           | 1    |
|                                          |                 | rs4147934  | 1,065,018   | S2045A               | T/G                 | <i>ABCA7</i>     | 0.28  | 0.55           | 0.98 |

|           |             |            |            |       |     |              |      |      |      |
|-----------|-------------|------------|------------|-------|-----|--------------|------|------|------|
|           |             | rs2074442  | 1,074,000  | D275E | T/A | <i>HMHA1</i> | 0.27 | 0.56 | 0.97 |
|           |             | rs2074454  | 1,080,311  | P603P | C/G | <i>HMHA1</i> | 0.26 | 0.49 | 0.88 |
|           |             | rs10404947 | 1,081,617  | Q769Q | G/A | <i>HMHA1</i> | 0.22 | 0.44 | 0.74 |
| rs3865444 | <i>CD33</i> | rs35112940 | 51,738,917 | G304R | G/A | <i>CD33</i>  | 0.21 | 0.57 | 0.98 |

<sup>a</sup> The first amino acid is linked to major allele and the second one to minor allele.

Key: IGAP, International Genomics of Alzheimer's Project; SNP, single nucleotide polymorphism; MAF, minor allele frequency; LD, linkage disequilibrium; 1000 Genomes, 1000 Genomes Project Phase 3 in individuals of European ancestry

Supplementary Table 7. Association of IGAP SNPs and the coding SNPs moderately correlated with the IGAP SNPs with Alzheimer's disease in two datasets: ADGC <sup>a</sup> and ADSP <sup>b</sup>

| IGAP SNP                             |                 |                   |                       | Exonic SNP |                   |                                         |                   |                                         |
|--------------------------------------|-----------------|-------------------|-----------------------|------------|-------------------|-----------------------------------------|-------------------|-----------------------------------------|
| SNP                                  | Closest gene    | ADGC <sup>a</sup> |                       | SNP ID     | ADGC <sup>a</sup> |                                         | ADSP <sup>b</sup> |                                         |
|                                      |                 | OR                | P-value               |            | OR                | P-value                                 | OR                | P-value                                 |
| Moderate LD ( $0.4 \leq r^2 < 0.8$ ) |                 |                   |                       |            |                   |                                         |                   |                                         |
| rs9271192                            | <i>HLA-DRB5</i> | 1.11              | $2.66 \times 10^{-4}$ | rs2308759  | -                 | -                                       | 1.09              | 0.072                                   |
|                                      |                 |                   |                       | rs1049092  | -                 | -                                       | 1.11              | <b><math>1.04 \times 10^{-3}</math></b> |
|                                      |                 |                   |                       | rs1049086  | 1.07              | <b>0.015</b>                            | 1.11              | <b><math>1.90 \times 10^{-3}</math></b> |
| rs2718058                            | <i>NME8</i>     | 0.95              | 0.024                 | rs2722372  | 0.93              | <b><math>9.02 \times 10^{-3}</math></b> | 0.90              | <b><math>4.79 \times 10^{-3}</math></b> |
|                                      |                 |                   |                       | rs2598044  | 0.93              | <b><math>6.64 \times 10^{-3}</math></b> | 0.90              | <b><math>5.41 \times 10^{-3}</math></b> |
| rs1476679                            | <i>ZCWPW1</i>   | 0.92              | $1.41 \times 10^{-3}$ | rs909152   | 0.93              | <b>0.010</b>                            | 0.96              | 0.28                                    |
| rs10838725                           | <i>CELF1</i>    | 1.05              | 0.054                 | rs12286721 | 1.08              | <b><math>2.58 \times 10^{-3}</math></b> | 1.05              | 0.14                                    |
| rs983392                             | <i>MS4A6A</i>   | 0.86              | $7.22 \times 10^{-9}$ | rs7232     | 0.87              | <b><math>8.47 \times 10^{-7}</math></b> | 0.87              | <b><math>4.08 \times 10^{-5}</math></b> |
| rs8093731                            | <i>DSG2</i>     | 0.99              | 0.90                  | rs16961975 | 1.23              | 0.074                                   | 1.22              | 0.22                                    |
|                                      |                 |                   |                       | rs61730311 | -                 | -                                       | 1.14              | 0.47                                    |
| rs4147929                            | <i>ABCA7</i>    | 1.12              | $1.39 \times 10^{-3}$ | rs4147930  | 1.07              | <b>0.024</b>                            | 1.10              | <b><math>7.50 \times 10^{-3}</math></b> |
|                                      |                 |                   |                       | rs4147934  | 1.08              | <b><math>8.45 \times 10^{-3}</math></b> | 1.11              | <b><math>4.28 \times 10^{-3}</math></b> |
|                                      |                 |                   |                       | rs2074442  | 1.07              | <b>0.023</b>                            | 1.08              | 0.037                                   |
|                                      |                 |                   |                       | rs2074454  | 1.05              | 0.13                                    | 1.09              | <b>0.016</b>                            |
|                                      |                 |                   |                       | rs10404947 | 1.06              | 0.092                                   | 1.07              | 0.089                                   |
| rs3865444                            | <i>CD33</i>     | 0.91              | $4.49 \times 10^{-4}$ | rs35112940 | 0.94              | 0.045                                   | 0.98              | 0.59                                    |

<sup>a</sup> Imputed genotype data from ADGC

<sup>b</sup> Whole exome sequencing data from ADSP

Bold p-value represents the statistical significance after FDR adjustment.

Key: IGAP, International Genomics of Alzheimer's Project; SNP, single nucleotide polymorphism; ADSP, Alzheimer's Disease Sequencing Project; ADGC, Alzheimer's Disease Genetic Consortium; OR, odds ratio; LD, linkage disequilibrium

Supplementary Table 8. Coding single nucleotide polymorphisms significantly associated with Alzheimer's disease

| Coding SNP                           | Gene            | Major/minor allele | Strand | # of transcripts | # of consequence type |            |                     |
|--------------------------------------|-----------------|--------------------|--------|------------------|-----------------------|------------|---------------------|
|                                      |                 |                    |        |                  | Missense              | Synonymous | Others <sup>a</sup> |
| Strong LD ( $r^2 \geq 0.8$ )         |                 |                    |        |                  |                       |            |                     |
| rs2296160                            | <i>CR1</i>      | G/A                | +      | 6                | 6                     | 0          | 0                   |
| rs2405442                            | <i>PILRA</i>    | C/T                | +      | 7                | 0                     | 5          | 2                   |
| rs1859788                            | <i>PILRA</i>    | G/A                | +      | 7                | 5                     | 0          | 2                   |
| rs7982                               | <i>CLU</i>      | A/G                | -      | 18               | 0                     | 8          | 10                  |
| rs12453                              | <i>MS4A6A</i>   | T/C                | -      | 22               | 0                     | 8          | 14                  |
| rs3752246                            | <i>ABCA7</i>    | C/G                | +      | 7                | 3                     |            | 4                   |
| Moderate LD ( $0.4 \leq r^2 < 0.8$ ) |                 |                    |        |                  |                       |            |                     |
| rs1049086                            | <i>HLA-DQB1</i> | G/A                | -      | 10               | 0                     | 5          | 5                   |
| rs2722372                            | <i>NME8</i>     | G/A                | +      | 6                | 2                     | 0          | 4                   |
| rs2598044                            | <i>NME8</i>     | C/T                | +      | 6                | 0                     | 2          | 4                   |
| rs7232                               | <i>MS4A6A</i>   | T/A                | -      | 13               | 9                     | 0          | 4                   |
| rs4147930                            | <i>ABCA7</i>    | A/G                | +      | 16               | 0                     | 4          | 12                  |
| rs4147934                            | <i>ABCA7</i>    | T/G                | +      | 15               | 4                     | 0          | 11                  |

<sup>a</sup> Including non-coding transcript exon variant, upstream gene variant, downstream gene variant, stop retained variant, and intron variant

Key: SNP, single nucleotide polymorphism

Supplementary Table 9. Association of the coding rare variants with Alzheimer's disease in ADSP <sup>a</sup>

| IGAP SNP   |                 | Exonic rare variant |             |                  |                   |      |                       |
|------------|-----------------|---------------------|-------------|------------------|-------------------|------|-----------------------|
| SNP        | Closest gene    | Rare variant ID     | Position    | 1000 Genomes     | ADSP <sup>a</sup> |      |                       |
|            |                 |                     |             | EUR              | MAF <sup>c</sup>  | OR   | P-value               |
|            |                 |                     |             | MAF <sup>b</sup> |                   |      |                       |
| rs9271192  | <i>HLA-DRB5</i> | rs11575848          | 31,686,943  | 0.0061           | 0.0049            | 1.55 | 0.030                 |
|            |                 | rs2070600           | 32,151,443  | 0.051            | 0.043             | 1.17 | 0.022                 |
| rs1476679  | <i>ZCWPWI</i>   | rs62483572          | 100,319,633 | 0.0061           | 0.0040            | 0.53 | $5.77 \times 10^{-3}$ |
| rs10792832 | <i>PICALM</i>   | rs74547795          | 85,431,954  | 0.0091           | 0.011             | 0.72 | 0.015                 |
| rs8093731  | <i>DSG2</i>     | rs111986709         | 29,054,294  | 0.024            | 0.038             | 0.85 | 0.024                 |

<sup>a</sup> Whole exome sequencing data from ADSP<sup>b</sup> MAF calculated by using 1000 Genomes Project Phase 3 in individuals of European ancestry<sup>c</sup> MAF calculated by using the study subjects in ADSP

Key: IGAP, International Genomics of Alzheimer's Project; SNP, single nucleotide polymorphism; ADSP, Alzheimer's Disease Sequencing Project; MAF, minor allele frequency; OR, odds ratio

Supplementary Table 10. Coding single nucleotide polymorphisms significantly associated with Alzheimer's disease

| Rare coding variants | Gene          | Major/minor allele | Strand | # of transcripts | # of consequence type |            |                     |
|----------------------|---------------|--------------------|--------|------------------|-----------------------|------------|---------------------|
|                      |               |                    |        |                  | Missense              | Synonymous | Others <sup>a</sup> |
| rs11575848           | <i>LY6G6C</i> | C/T                | -      | 18               | 2                     | 0          | 16                  |
| rs2070600            | <i>AGER</i>   | C/T                | -      | 23               | 9                     | 0          | 14                  |
| rs62483572           | <i>EPO</i>    | G/A                | +      | 1                | 1                     | 0          | 0                   |
| rs74547795           | <i>SYTL2</i>  | G/T                | -      | 24               | 10                    | 0          | 14                  |
| rs111986709          | <i>DSG3</i>   | C/T                | +      | 1                | 1                     | 0          | 0                   |

<sup>a</sup> Including non-coding transcript exon variant, upstream gene variant, downstream gene variant, stop retained variant, and intron variant

Supplementary Table 11. Coding common single nucleotide polymorphisms and rare variants significantly associated with Alzheimer's disease

| Coding SNP/variant | Gene            | Exon  | Variant <sup>a</sup> | SIFT             | PolyPhen-2 (HumDiv)       | PROVEAN             | GERP++ RS score |
|--------------------|-----------------|-------|----------------------|------------------|---------------------------|---------------------|-----------------|
| Common SNP         |                 |       |                      |                  |                           |                     |                 |
| rs2296160          | <i>CR1</i>      | 44/47 | A2419T               | Tolerated (0.8)  | Benign (0.0)              | Neutral (-0.10)     | -8.25           |
| rs9270303          | <i>HLA-DRB1</i> | 1/6   | A13T                 | Tolerated (1.0)  | Benign (0.0)              | Neutral (1.46)      | 1.62            |
| rs2722372          | <i>NME8</i>     | 5/18  | R43K                 | Tolerated (1.0)  | Benign (0.0)              | Neutral (1.39)      | 3.85            |
| rs1859788          | <i>PILRA</i>    | 2/7   | G78R                 | Tolerated (1.0)  | Benign (0.0)              | Neutral (6.98)      | 3.28            |
| rs7232             | <i>MS4A6A</i>   | 7/7   | T213S                | Tolerated (0.08) | Possibly damaging (0.573) | Neutral (-2.07)     | -5.11           |
| rs3752246          | <i>ABCA7</i>    | 33/47 | A1527G               | Tolerated (0.79) | Benign (0.0)              | Neutral (2.70)      | 1.57            |
| rs4147934          | <i>ABCA7</i>    | 46/47 | S2045A               | Tolerated (0.97) | Benign (0.057)            | Neutral (0.06)      | 1.15            |
| Rare variant       |                 |       |                      |                  |                           |                     |                 |
| rs11575848         | <i>LY6G6C</i>   | 3/3   | R103Q                | Tolerated (0.28) | Probably damaging (0.999) | Neutral (-0.83)     | 3.83            |
| rs2070600          | <i>AGER</i>     | 3/11  | G82S                 | Damaging (0.01)  | Possibly damaging (0.864) | Neutral (-1.43)     | 5.82            |
| rs62483572         | <i>EPO</i>      | 3/5   | D70N                 | Tolerated (0.07) | Possibly damaging (0.924) | Neutral (-2.03)     | 4.38            |
| rs74547795         | <i>SYTL2</i>    | 2/13  | A825D                | Damaging (0.003) | Possibly damaging (0.69)  | Deleterious (-3.21) | 4.89            |
| rs111986709        | <i>DSG3</i>     | 15/16 | S771F                | Damaging (0.04)  | Possibly damaging (0.516) | Deleterious (-3.62) | 6.06            |

<sup>a</sup> The first amino acid is linked to major allele and the second one to minor allele, and the codon number is for the canonical transcript. Key: SNP, single nucleotide polymorphism; RS, rejected substitutions

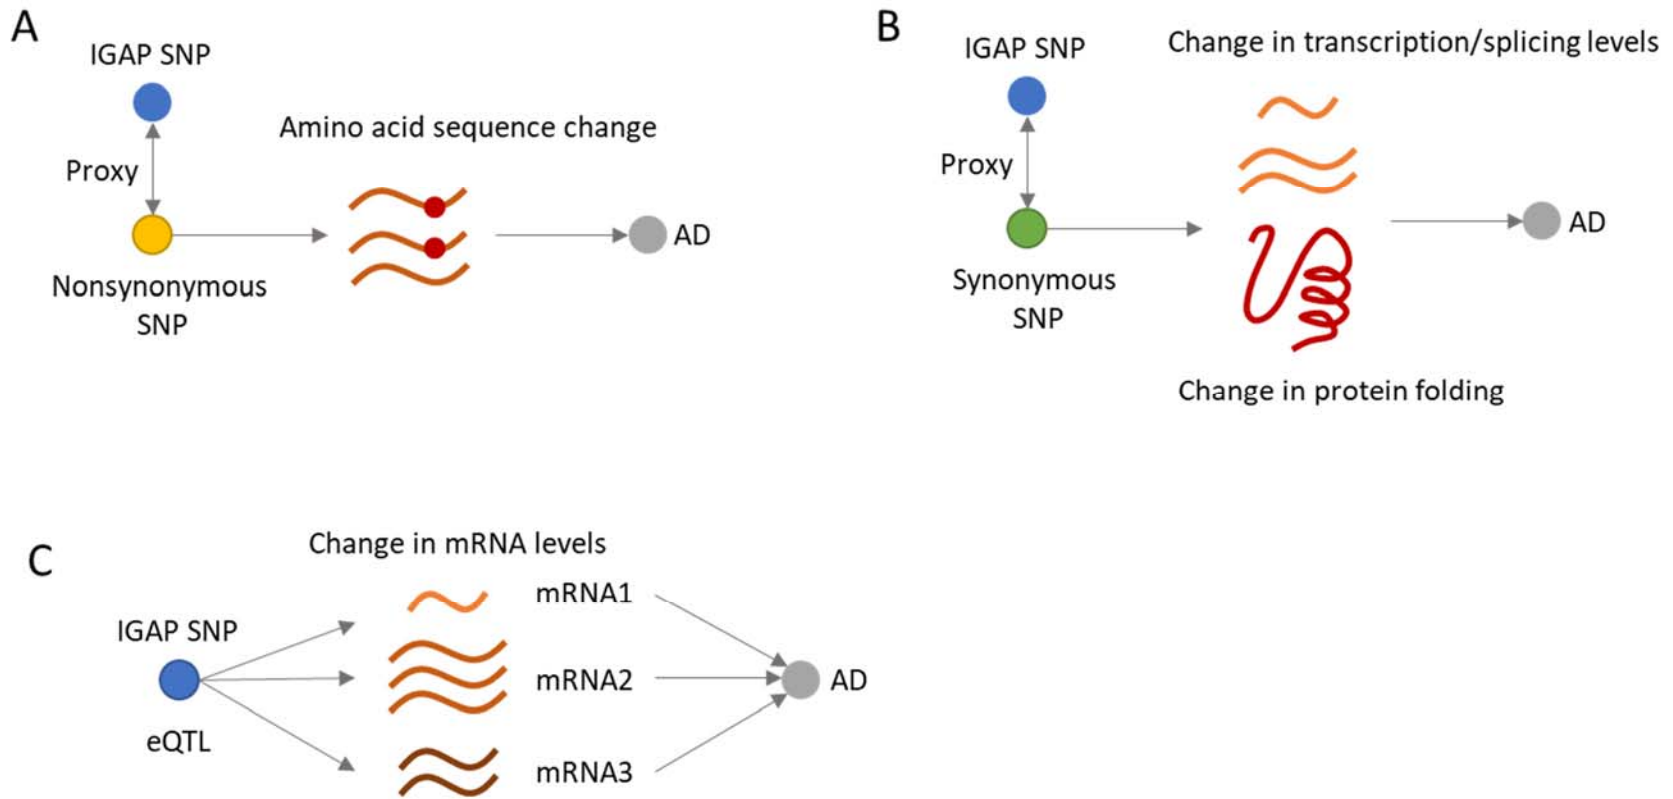

Supplementary Figure 1. Possible causal relationships between single nucleotide polymorphisms (SNPs), mRNA, and phenotype.

Keys: IGAP, International Genomics of Alzheimer's Project; SNP, single nucleotide polymorphism; eQTL, expression quantitative trait locus



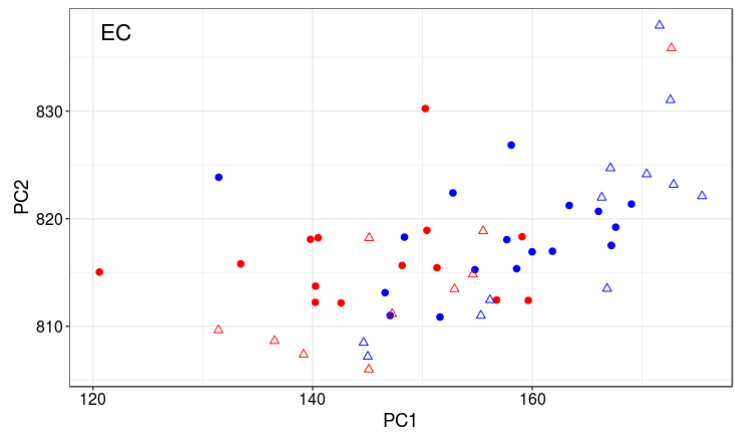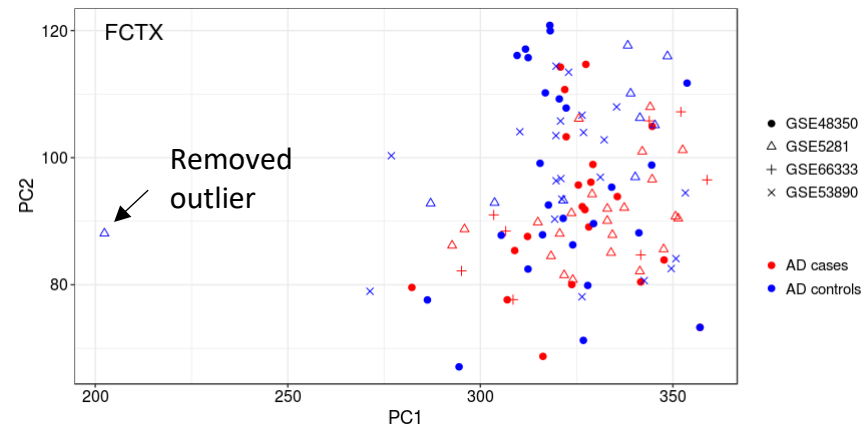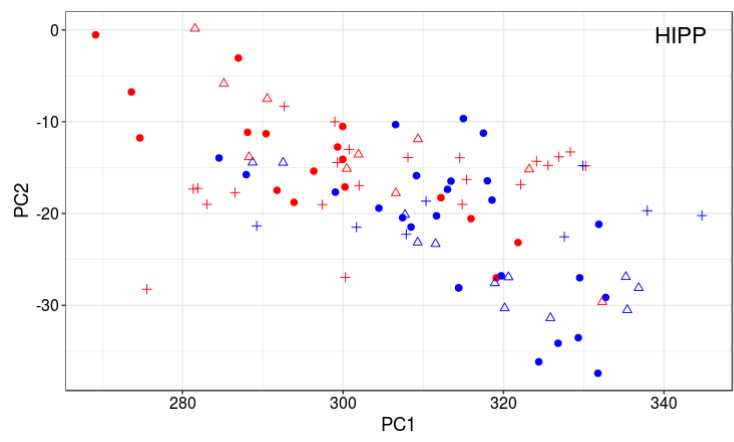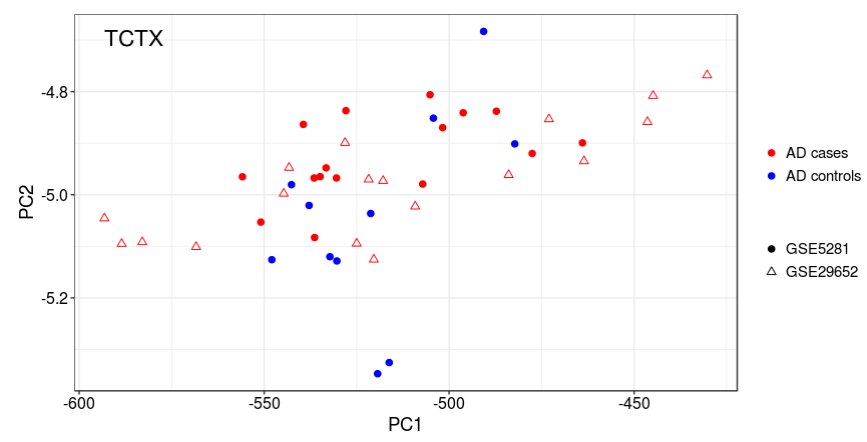

Supplementary Figure 2. Principal component analysis of the merged datasets by using ComBat in “sva” Bioconductor R package

Keys: EC, entorhinal cortex; HIPP, hippocampus; FCTX, frontal cortex; TCTX, temporal cortex

## References

1. Lambert, J.C., et al., *Meta-analysis of 74,046 individuals identifies 11 new susceptibility loci for Alzheimer's disease*. Nat Genet, 2013. **45**(12): p. 1452-8.
2. Lambert, J.C., et al., *Genome-wide association study identifies variants at CLU and CR1 associated with Alzheimer's disease*. Nat Genet, 2009. **41**(10): p. 1094-9.
3. Harold, D., et al., *Genome-wide association study identifies variants at CLU and PICALM associated with Alzheimer's disease*. Nat Genet, 2009. **41**(10): p. 1088-93.
4. Hollingworth, P., et al., *Common variants at ABCA7, MS4A6A/MS4A4E, EPHA1, CD33 and CD2AP are associated with Alzheimer's disease*. Nat Genet, 2011. **43**(5): p. 429-35.
5. Naj, A.C., et al., *Common variants at MS4A4/MS4A6E, CD2AP, CD33 and EPHA1 are associated with late-onset Alzheimer's disease*. Nat Genet, 2011. **43**(5): p. 436-41.
6. Shulman, J.M., et al., *Genetic susceptibility for Alzheimer disease neuritic plaque pathology*. JAMA Neurol, 2013. **70**(9): p. 1150-7.
7. Biffi, A., et al., *Genetic variation and neuroimaging measures in Alzheimer disease*. Arch Neurol, 2010. **67**(6): p. 677-85.
8. Seshadri, S., et al., *Genome-wide analysis of genetic loci associated with Alzheimer disease*. JAMA, 2010. **303**(18): p. 1832-40.
9. Shuai, P., et al., *Genetic associations of CLU rs9331888 polymorphism with Alzheimer's disease: A meta-analysis*. Neurosci Lett, 2015. **591**: p. 160-5.
10. Huang, K.L., et al., *A common haplotype lowers PU.1 expression in myeloid cells and delays onset of Alzheimer's disease*. Nat Neurosci, 2017. **20**(8): p. 1052-1061.
11. Wang, Z., et al., *Meta-analysis of the Association between Alzheimer Disease and Variants in GAB2, PICALM, and SORL1*. Mol Neurobiol, 2016. **53**(9): p. 6501-6510.
12. Sassi, C., et al., *ABCA7 p.G215S as potential protective factor for Alzheimer's disease*. Neurobiol Aging, 2016. **46**: p. 235 e1-9.
